# Supplementary material for: PRO-C3 is a predictor of clinical outcomes in distinct cohorts of patients with advanced liver disease
Source: PubMed Central journal article supplement (PMC10240276; doi:10.1016/j.jhepr.2023.100743), 2023-03-28

# **PRO-C3 is a predictor of clinical outcomes in distinct cohorts of patients with advanced liver disease**

Mette J Nielsen<sup>1</sup>, Grace E Dolman<sup>2</sup>, Rebecca Harris<sup>2</sup>, Peder Frederiksen<sup>1</sup>, Jane Chalmers<sup>2</sup>,  
Jane Grove<sup>2,5</sup>, William L Irving<sup>2,4</sup>, Morten A Karsdal<sup>1</sup>, Keyur Patel<sup>3</sup>, Diana Julie Leeming<sup>1</sup>,  
Indra Neil Guha<sup>2,5</sup>

## **Table of contents**

|              |   |
|--------------|---|
| Fig. S1..... | 1 |
| Fig. S2..... | 2 |

**Fig. S1**

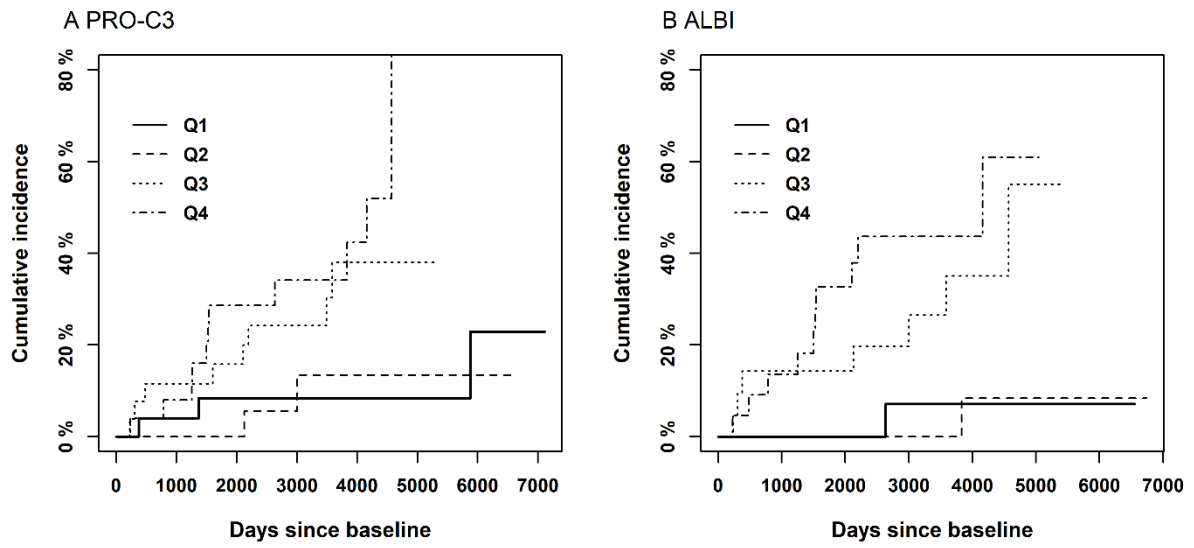

**Fig. S2**

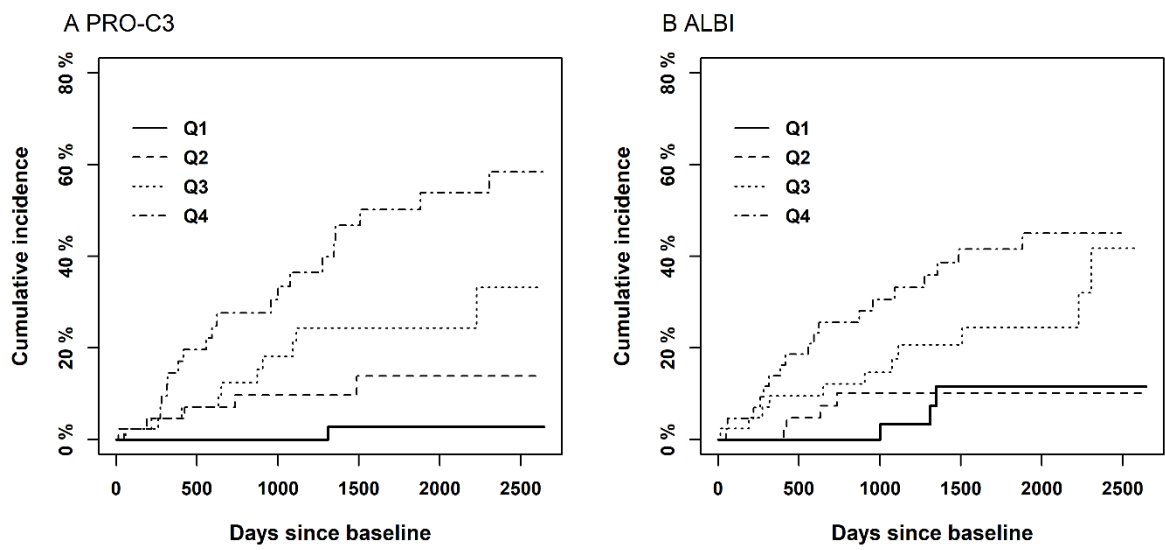

Supplement: mmc1.pdf [file mmc1.pdf]
